# Supplementary material
Source: PubMed Central journal article supplement (PMC3198346)
Supplement: 1110889108_pnas.201110889SI.pdf [file 1110889108_pnas.201110889SI.pdf]

# Supporting Information

Arslan et al. 10.1073/pnas.1110889108

## SI Materials and Methods

**Virus Isolation.** Megavirus chilensis was isolated from coastal waters in front of the ECIM marine station from Las Cruces, Chile. One liter of seawater was supplemented with 4% of rice media (supernatant obtained after autoclaving 1 L of seawater with 40 grains of rice) and let to incubate for 1 mo in the dark at room temperature. The rationale of such procedure is to get rid of the phototrophic microorganisms while allowing the heterotrophic bacteria to grow for a while, when they then feed the phagocytic/heterotrophic protozoans that finally expand to a population allowing eventual viruses to multiply (1). Seawater with rice medium was then filtered first through a polycarbonate Isopore membrane filter of 1.2- $\mu\text{m}$  pore size and then through 0.2- $\mu\text{m}$  pore size membrane filter (RTTP04700, GTTP04700; Millipore). The 0.2- $\mu\text{m}$  pore size membrane was then treated with gentamicin at 1 mg/mL final concentration, 10% penicillin/streptomycin and 5% fungizone for 3 d. Supernatant was inoculated to several acanthamoeba species cultured in microplates and monitored for cell lysis.

**Giant Virus Naming.** We believe it is useful and desirable that the name of a newly isolated microorganism convey some of its most distinctive properties. After the initial naming of Mimivirus (for “microbe mimicking”), already not a very good name because the prefix “mimi” does not convey a helpful scientific notion, newly isolated related viruses are receiving increasingly random/funny names such as “Mamavirus,” “Moumouvirus,” “Courdovirus,” and “Terra” (2). Although it is traditionally the privilege of the first authors describing a new microbe to give it whatever name of their choosing, we believe the current trend is counterproductive and should give way to more informative names. With the few examples now at hand, it is clear that a distinctive feature of the above giant viruses (or of their close ancestors) is to possess genome in excess of a “megabase”. Hence, the term “Megavirus,” and the proposed family/genus “*Megaviridae*” that will be proposed to the International Committee on Taxonomy of Viruses. “Chilensis” then refers to the location where this virus was first isolated. Finally, we broke with tradition not incorporating the host’s species to the virus name. This decision is justified by the fact that Megavirus and other Mimivirus relatives are capable of replicating in a variety of acanthamoeba species, whereas the phagocytic protozoan that is the natural host of *Megavirus chilensis* is not known, as will be the situation for most viruses isolated from the environment using the acanthamoeba coculture protocol.

**Genome Assembly.** The Megavirus genome was assembled by using a combination of 454-titanium and Illumina Hiseq paired-end reads. We first assembled the 42,288,396 Hiseq paired-end reads by using the Velvet assembler (3) with the following parameters:

1. Massana R, del Campo J, Dinter C, Sommaruga R (2007) Crash of a population of the marine heterotrophic flagellate *Cafeteria roenbergensis* by viral infection. *Environ Microbiol* 9:2660–2669.
2. La Scola B, et al. (2010) Tentative characterization of new environmental giant viruses by MALDI-TOF mass spectrometry. *Intervirology* 53:344–353.
3. Zerbino DR, Birney E (2008) Velvet: algorithms for de novo short read assembly using de Bruijn graphs. *Genome Res* 18:821–829.
4. Chevreur B, Wetter T, Suhai S (1999) Genome sequence assembly using trace signals and additional sequence information. *Computer science and biology. Proceedings of the German Conference on Bioinformatics* 99:45–56.
5. Bonfield JK, Whitwham A (2010) Gap5—editing the billion fragment sequence assembly. *Bioinformatics* 26:1699–1703.
6. Besemer J, Lomsadze A, Borodovsky M (2001) GeneMarkS: A self-training method for prediction of gene starts in microbial genomes. Implications for finding sequence motifs in regulatory regions. *Nucleic Acids Res* 29:2607–2618.

$k = 95$ ,  $\text{ins\_length} = 280$ ,  $\text{cov\_cutoff} = 200$  and  $\text{exp\_cov} = 382$ . We next mapped the 278,663 454-titanium reads onto the assembled contigs by using Mira (4) to extend them. Gap5 (5) software was used to join the resulting overlapping contigs into a single one. We finally remapped the Hiseq reads at high stringency to correct sequencing errors. The 454 technology generated a large number of local errors due to the miscalling of homopolymeric sequences in the Megavirus A+T rich genome. Steep drops in the Illumina read coverage were used to guide the visual inspection of the sequence and its manual correction (usually a single A or T nucleotide insertion or deletion). The total Illumina data used for this finishing step corresponds to 1/10th of a flow cell channel used in a multiplexed fashion with nine other unrelated sequencing projects. A few positions were confirmed by PCR followed by Sanger sequencing. The final Megavirus genome sequence corresponds to a single 1,259,197-nt-long contig.

**Gene Annotation.** The Megavirus protein coding regions (CDSs) were identified by using the GeneMarkS algorithm (6). Transfer RNAs were searched by using tRNAscan-SE (7) with the general tRNA model. The functional assignment of these predicted Megavirus genes was performed by using a combination of BlastP searches against public databases using an  $e$  value threshold of  $10^{-5}$  and protein motif identification using Interproscan (8). Megavirus/Mimivirus orthologous gene pairs were defined based on the best-reciprocal blast hit criterion between the two proteomes, again using BlastP at an  $e$  value threshold of  $10^{-5}$ . Megavirus (respectively Mimivirus) “paralogues” correspond to predicted proteins exhibiting BlastP similarity within the Mimivirus (respectively Megavirus) proteome at the same threshold but failing the reciprocal best match criterion. These correspond to Megavirus/Mimivirus specific gene duplications. The last category of CDSs, specific to each virus, corresponds to those not exhibiting a BlastP hit at the conservative  $e$  value threshold of  $10^{-5}$ .

**Phylogenetic Analysis.** The most similar homologs of Megavirus aminoacyl tRNA synthetases were first identified by using the Blast-Explorer tool (9) on the Phylogeny.fr (10) server. A subset of sequences was selected based on the alignment quality (preserving enough informative positions) and their phylogenetic distribution among the main domains (Archaea, Eukarya, Eubacteria). An optimal multiple alignment was then computed by using MAFFT version 6 (11) on the CBRC-AIST server (mafft.cbrc.jp/alignment/server/). Several trees were then reconstructed from this alignment by using a simple neighbor-joining algorithm (with the JTT model) or PhyML (with the WAG model) (10). The topology of the reconstructed trees and the confidence values were very similar for both methods.

7. Schattner P, Brooks AN, Lowe TM (2005) The tRNAscan-SE, snoscan and snoGPS web servers for the detection of tRNAs and snoRNAs. *Nucleic Acids Res* 33(Web Server issue):W686–W689.
8. Hunter S, et al. (2009) InterPro: the integrative protein signature database. *Nucleic Acids Res* 37(Database issue):D211–D215.
9. Dereeper A, Audic S, Claverie JM, Blanc G (2010) BLAST-EXPLORER helps you building datasets for phylogenetic analysis. *BMC Evol Biol* 10:8.
10. Dereeper A, et al. (2008) Phylogeny.fr: Robust phylogenetic analysis for the non-specialist. *Nucleic Acids Res* 36(Web Server issue):W465–W469.
11. Katoh K, Toh H (2008) Recent developments in the MAFFT multiple sequence alignment program. *Brief Bioinform* 9:286–298.









OtV, *Ostreococcus tauri* virus; MpV, *Micromonas* sp. RCC1109 virus; OIV, *Ostreococcus lucimarinus* virus; EhV, *Emiliania huxleyi* virus; FsV, *Feldmannia* species virus; EsV, *Ectocarpus siliculosus* virus; WIV, *Wiseana* iridescent virus; IIV, Invertebrate iridescent virus; LDV, Lymphocystis disease virus; ISKNV, Infectious spleen and kidney necrosis virus; ASFV, African swine fever virus.

1. Katoh K, Toh H (2008) Recent developments in the MAFFT multiple sequence alignment program. *Brief Bioinform* 9:286–298.
2. Dereeper A, et al. (2008) Phylogeny.fr: Robust phylogenetic analysis for the non-specialist. *Nucleic Acids Res* 36(Web Server issue):W465–W469.
3. Woese CR, Olsen GJ, Ibba M, Söll D (2000) Aminoacyl-tRNA synthetases, the genetic code, and the evolutionary process. *Microbiol Mol Biol Rev* 64:202–236.

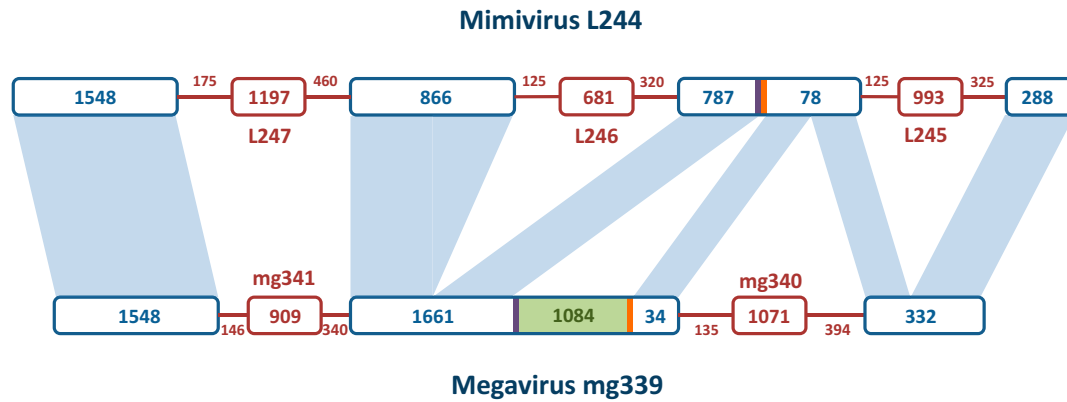

**Fig. S8.** Complex reorganization of the RPB2 gene in Megavirus. Exons are shown in blue, introns in brown, and the intein in green. Numbers correspond to DNA segment sizes in base pairs. The first exon is the only gene segment for which there is a one-to-one correspondence between Mimivirus and Megavirus. The second Megavirus exon incorporates most of the coding sequence of Mimivirus second and third exons, in addition to a 1,084-bp intein (1). The purple and orange boxes correspond to the last (H) and the first (S) amino acid of the N-terminal and C-terminal exons, respectively. The third Megavirus exon corresponds to the end of the Mimivirus third exon and its entire fourth exon.

1. Perler FB (2002) InBase: The intein database. *Nucleic Acids Res* 30:383–384.

## Other Supporting Information Files

[Table S1 \(DOC\)](#)
